# Supplementary material
Source: PubMed Central journal article supplement (PMC2765492)
Supplement: NIHMS108636-supplement-1_si_001.pdf [file NIHMS108636-supplement-1_si_001.pdf]

## A Direct Route to Cyclic Organic Nanostructures via Ring-Expansion Metathesis Polymerization of a Dendronized Macromonomer

Andrew J. Boydston,<sup>a</sup> Thomas W. Holcombe,<sup>b</sup> David A. Unruh,<sup>b</sup> Jean M. J. Fréchet,<sup>b,\*</sup> and Robert H. Grubbs<sup>a,†</sup>

<sup>a</sup>Arnold and Mabel Beckman Laboratory of Chemical Synthesis, Division of Chemistry and Chemical Engineering, California Institute of Technology, Pasadena, California 91125. <sup>b</sup>College of Chemistry, University of California, Berkeley, California 94720-1460, and Materials Sciences Division, Lawrence Berkeley National Laboratory, Berkeley, California 94720

email: rhg@caltech.edu and frechet@berkeley.edu

### SUPPORTING INFORMATION

**General Considerations.** Cyclic catalysts **SC-5** and **UC-6** and macromonomer **1** were prepared as previously described and stored in a N<sub>2</sub>-filled glove-box.<sup>1,2</sup> C<sub>6</sub>D<sub>6</sub> was obtained from a solvent purification column<sup>3</sup> and stored in a N<sub>2</sub>-filled glove-box. All polymerization reactions were conducted using dry, degassed solvents under N<sub>2</sub> atmosphere. Gel permeation chromatography (GPC) was carried out in THF on two PLgel 10 μm mixed-B LS columns (Polymer Labs) connected in series with a DAWN EOS multiangle laser light scattering (MALLS) detector and an Optilab DSP differential refractometer (both from Wyatt Technology). Molecular weights were determined from light scattering and considered to be absolute. Atomic force microscopy was performed using a Veeco (Digital Instruments) Multimode microscope with a Nanoscope V controller. Imaging was performed in semi-contact (tapping) mode using Veeco RTESP tips. AFM samples were prepared by spin-coating 300 μL of a solution of **P1** in CHCl<sub>3</sub> onto freshly cleaved mica at 1000 rpm for 18 s. Sonicated polymer samples were prepared for imaging by sonicating the same **P1** solution used for cyclic imaging for 30 s, and then following the same protocol for cyclic sample preparation.

**Representative Polymerization Procedure.** In a N<sub>2</sub>-filled glove-box, a screw-cap NMR tube was charged with macromonomer **1** (126 mg, 0.14 mmol) and C<sub>6</sub>D<sub>6</sub> (0.65 mL). The NMR tube was sealed with a septum-lined screw cap and placed in an oil bath at 55 °C until complete macromonomer dissolution was achieved. A stock solution of cyclic catalyst **SC-5** (0.06 M in C<sub>6</sub>D<sub>6</sub>) was prepared and 50 μL of this solution was injected into the NMR tube containing **1**. The reaction solution was maintained at 55 °C and monitored by <sup>1</sup>H NMR spectroscopy. Upon completion, the solution was added dropwise into MeOH (15 mL) causing precipitation of polymer **P1**. The product was isolated via vacuum filtration and dried under high vacuum to provide 122 mg (97% yield) of **P1**.

- 
- 1) Boydston, A. J.; Xia, Y.; Kornfield, J. A.; Gorodetskaya, I. A.; Grubbs, R. H. *J. Am. Chem. Soc.* **2008**, *130*, 12775.
  - 2) Rajaram, S.; Choi, T.-L.; Rolandi, M.; Fréchet, J. M. J. *J. Am. Chem. Soc.* **2007**, *129*, 9619.
  - 3) Pangborn, A. B.; Giardello, M. A.; Grubbs, R. H.; Rosen, R. K.; Timmers, F. J. *Organometallics* **1996**, *15*, 1518.

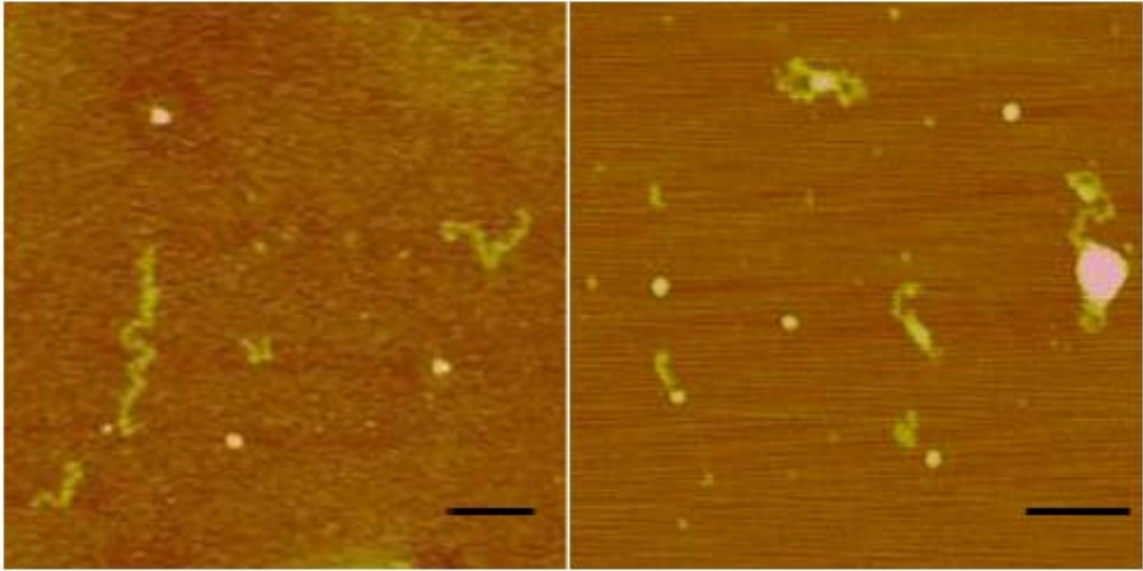

**Figure S1.** AFM images of  $\mathbf{P1}_{\text{son}}$  prepared as described above. Scale bars = 100 nm.
